# Supplementary material for: Genetic interactions between specific chromosome copy number alterations dictate complex aneuploidy patterns
Source: PubMed Central journal article supplement (PMC6295164; doi:10.1101/gad.319400.118), 2018-12-01
Supplement: supp_gad.319400.118_Supplemental_Figure_S3.pdf [file supp_gad.319400.118_Supplemental_Figure_S3.pdf]

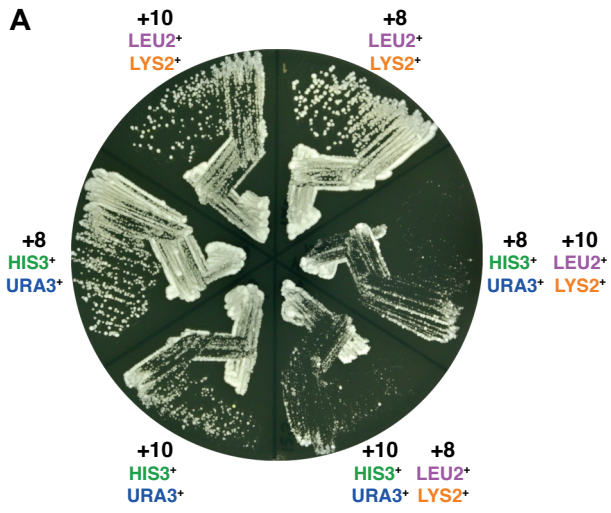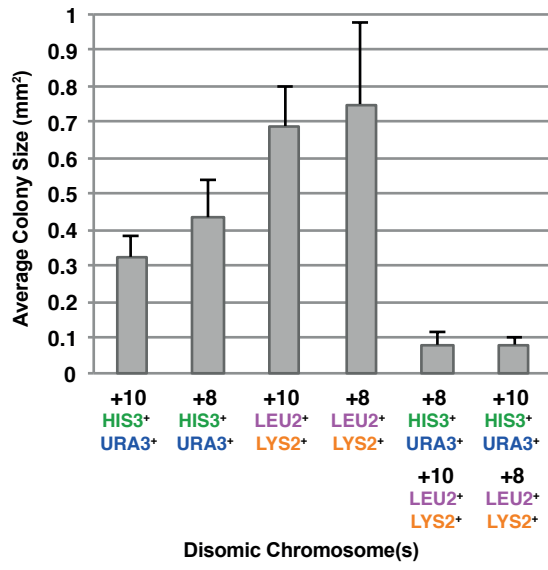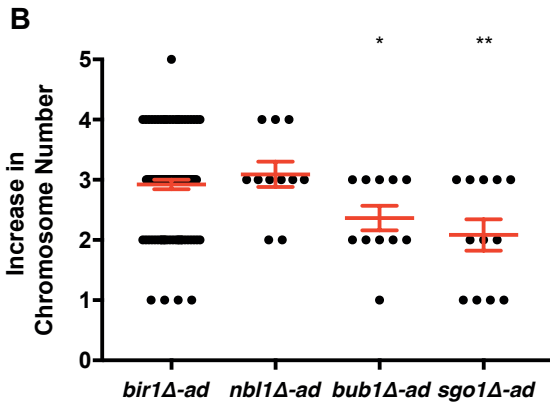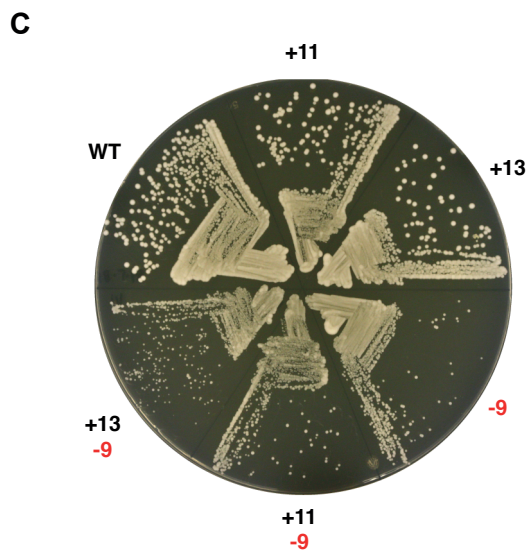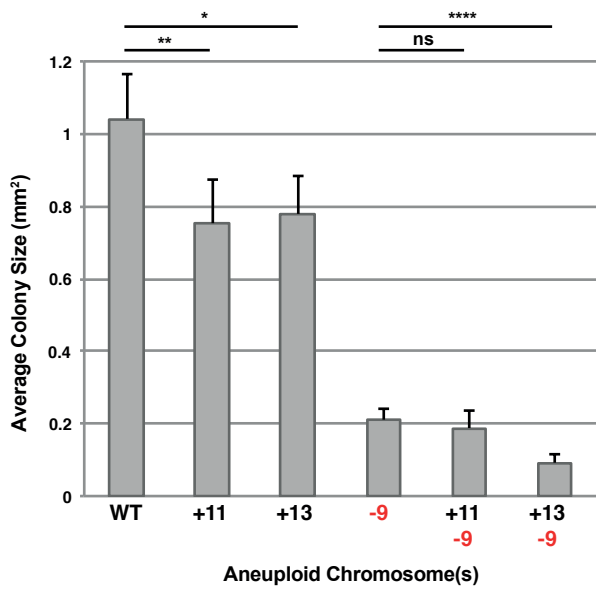

**Figure S3: Synthetic negative genetic interaction between chromosome 8 and 10 disomy and growth rates for different diploid *bir1Δ-ad* karyotypes.**

**A)** Strains with disomy of chromosomes 8, 10, or both were struck out for single colonies on a YPAD plate. The graph on the right shows the measured colony sizes (mm<sup>2</sup>). Error bars represent the standard deviation for average colony sizes of three independently generated strains (n = 3).

**B)** Increase in the number of total chromosomes for adapted strains with the indicated mutations. Mean values and the standard errors are in red. \*p ≤ 0.05, \*\*p < 0.001.

**C)** Strains with either aneuploidy of chromosomes 13, 11, 9 or a combination of 11 and 9 or 13 and 9 were struck out for single colonies on a YPAD plate. The graph on the right shows the measured colony sizes. Error bars represent the standard deviation for average colony sizes for 2 replicates of three independently generated strains (n = 6). \*p ≤ 0.05, \*\*p < 0.001, \*\*\*p < 0.0001.
