# Supplementary material for: Genetic interactions between specific chromosome copy number alterations dictate complex aneuploidy patterns
Source: PubMed Central journal article supplement (PMC6295164; doi:10.1101/gad.319400.118), 2018-12-01
Supplement: supp_gad.319400.118_Supplemental_Figure_S4.pdf [file supp_gad.319400.118_Supplemental_Figure_S4.pdf]

Colon Adenocarcinoma

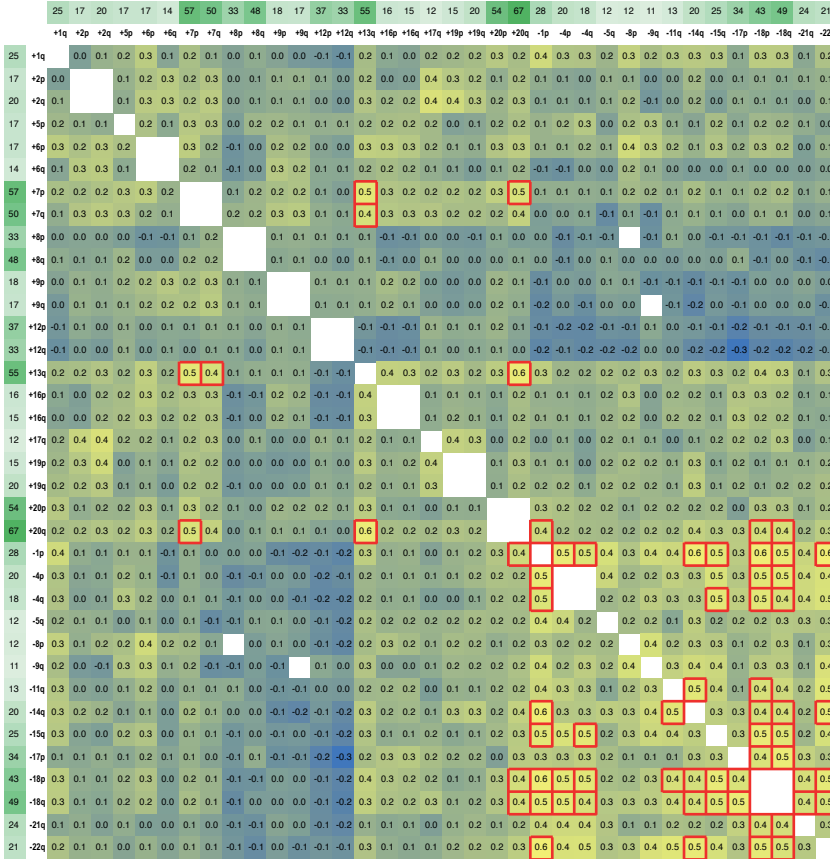

Glioblastoma Multiforme

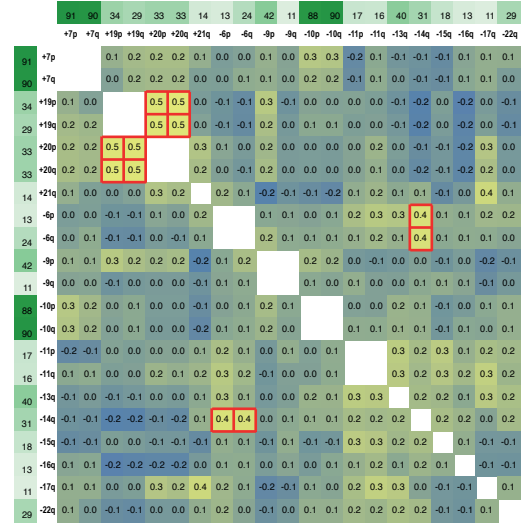

Kidney Renal Clear Cell Carcinoma

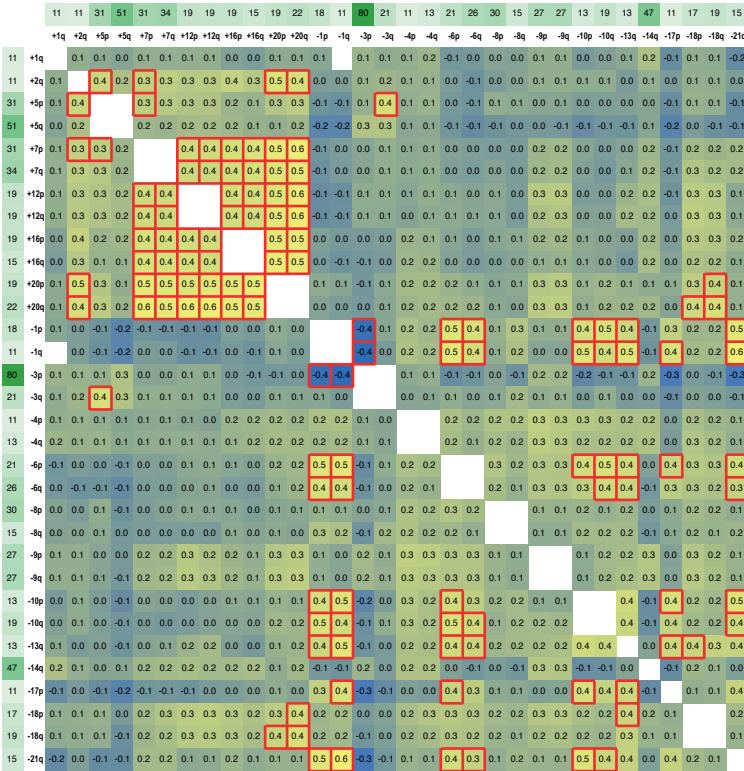

Stomach Adenocarcinoma

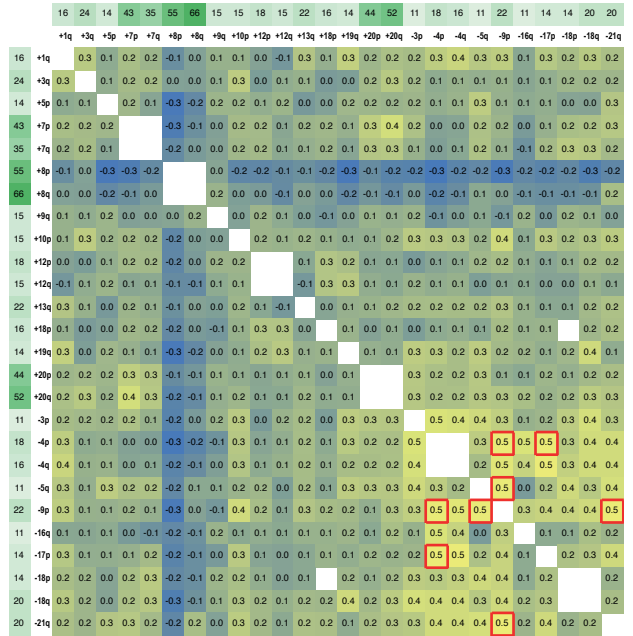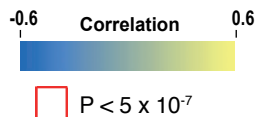

**Figure S4: Chromosome arm copy number correlations in four different cancer types.**

Pairwise correlation coefficients for chromosome arm aneuploidy are shown as a heat map for 138 Colon Adenocarcinoma, 160 Glioblastoma Multiforme, 253 Kidney Renal Clear Cell Carcinoma, and 119 Stomach Adenocarcinoma tumors. The frequency of each aberration is shown in green as a percentage. The red highlighted border indicates a  $P < 5 \times 10^{-7}$  in the hypergeometric test.
