# Supplementary material for: Genetic interactions between specific chromosome copy number alterations dictate complex aneuploidy patterns
Source: PubMed Central journal article supplement (PMC6295164; doi:10.1101/gad.319400.118), 2018-12-01
Supplement: supp_gad.319400.118_Supplemental_Table_S1.pdf [file supp_gad.319400.118_Supplemental_Table_S1.pdf]

**Table S1. Plasmids and Yeast Strains used in this study.**

| Strain                                      | Genotype                                                                                                                                                                                                                                                                                                                                                                                     | Source | Background | Figure(s)                          |
|---------------------------------------------|----------------------------------------------------------------------------------------------------------------------------------------------------------------------------------------------------------------------------------------------------------------------------------------------------------------------------------------------------------------------------------------------|--------|------------|------------------------------------|
| CCY747                                      | <i>MAT<math>\alpha</math></i> , <i>leu2,3-112</i> , <i>lys2<math>\Delta</math></i> , <i>ura3-1</i> , <i>his3-11::pCUP1-GFP12-lacI12:HIS3</i> , <i>trp1-1::256lacO:TRP1</i>                                                                                                                                                                                                                   | a      | W303       | 1B                                 |
| CCY149                                      | <i>MAT<math>\alpha</math>/MAT<math>\alpha</math></i> , <i>ura3-1/ura3-1</i> , <i>LEU2/leu2,3-112</i> , <i>LYS2/lys2<math>\Delta</math></i> , <i>ADE2/ade2-1</i> , <i>can1-100</i> , <i>bar1<math>\Delta</math></i> , <i>his3-11::pCUP1-GFP12-lacI12:HIS3/his3-11::pCUP1-GFP12-lacI12:HIS3</i> <i>trp1-1::256lacO:TRP1/trp1-1::256lacO:TRP1</i> , <i>BIR1/bir1<math>\Delta</math>::hphNT1</i> | a      | W303       | 1                                  |
| <i>bir1<math>\Delta</math>-ad</i> haploids  | All 102 strains were derived from tetrad dissection of CCY149                                                                                                                                                                                                                                                                                                                                | c      | W303       | 1B, 1C, 1D, 1E, 3A, 3B, 3C, 3F, S1 |
| <i>bir1<math>\Delta</math>-ad2</i> haploids | All haploid strains were derived from <i>bir1<math>\Delta</math>-ad</i> haploids                                                                                                                                                                                                                                                                                                             | c      | W303       | 7B, 7C                             |
| BY4741                                      | <i>MAT<math>\alpha</math></i> , <i>his3<math>\Delta</math>1</i> , <i>leu2<math>\Delta</math>0</i> , <i>ura3<math>\Delta</math>0</i> , <i>met15<math>\Delta</math>0</i>                                                                                                                                                                                                                       | b      | S288c      | -                                  |
| BY4742                                      | <i>MAT<math>\alpha</math></i> , <i>his3<math>\Delta</math>1</i> , <i>leu2<math>\Delta</math>0</i> , <i>ura3<math>\Delta</math>0</i>                                                                                                                                                                                                                                                          | b      | S288c      | -                                  |
| CCY1865                                     | <i>MAT<math>\alpha</math></i> , <i>his3<math>\Delta</math>1</i> , <i>leu2<math>\Delta</math>0</i> , <i>ura3<math>\Delta</math>0</i>                                                                                                                                                                                                                                                          | c      | S288c      | -                                  |
| CCY1905                                     | <i>MAT<math>\alpha</math></i> , <i>leu2,3-112</i> , <i>lys2<math>\Delta</math></i> , <i>ura3-1</i> , <i>his3-11::pCUP1-GFP12-lacI12:HIS3</i> , <i>trp1-1::256lacO:TRP1</i> , <i>bir1<math>\Delta</math>::hphNT1</i> , <i>pCC598:URA3</i>                                                                                                                                                     | c      | W303       | -                                  |
| CCY1976                                     | CCY1905 + <i>cen2::p<sup>-GAL1</sup>-CEN3:LYS2/cen2::p<sup>-GAL1</sup>-CEN3:lys2::pCC644:LEU2</i>                                                                                                                                                                                                                                                                                            | c      | W303       | 2B                                 |
| CCY1947                                     | CCY1905 + <i>cen10::p<sup>-GAL1</sup>-CEN3:LYS2/cen10::p<sup>-GAL1</sup>-CEN3:lys2::pCC644:LEU2</i>                                                                                                                                                                                                                                                                                          | c      | W303       | 2B                                 |
| CCY2161                                     | CCY1905 + <i>cen3::p<sup>-GAL1</sup>-CEN3:LYS2/cen3::p<sup>-GAL1</sup>-CEN3:lys2::pCC644:LEU2</i>                                                                                                                                                                                                                                                                                            | c      | W303       | 2B                                 |
| CCY1943                                     | CCY1905 + <i>cen8::p<sup>-GAL1</sup>-CEN3:LYS2/cen8::p<sup>-GAL1</sup>-CEN3:lys2::pCC644:LEU2</i>                                                                                                                                                                                                                                                                                            | c      | W303       | 2B                                 |
| CCY2284                                     | CCY1905 + <i>cen9::p<sup>-GAL1</sup>-CEN3:LYS2/cen9::p<sup>-GAL1</sup>-CEN3:lys2::pCC644:LEU2</i>                                                                                                                                                                                                                                                                                            | c      | W303       | 2B                                 |
| CCY1924                                     | CCY1865 + <i>cen8::p<sup>-GAL1</sup>-CEN3:URA3/cen8::p<sup>-GAL1</sup>-CEN3:ura3::pCC644:HIS3</i>                                                                                                                                                                                                                                                                                            | c      | S288c      | S3A                                |
| CCY1927                                     | CCY1865 + <i>cen10::p<sup>-GAL1</sup>-CEN3:URA3/cen10::p<sup>-GAL1</sup>-CEN3:ura3::pCC644:HIS3</i>                                                                                                                                                                                                                                                                                          | c      | S288c      | S3A                                |
| CCY2122                                     | CCY1865 + <i>cen10::p<sup>-GAL1</sup>-CEN3:LYS2/cen10::p<sup>-GAL1</sup>-CEN3:lys2::pCC644:LEU2</i>                                                                                                                                                                                                                                                                                          | c      | S288c      | S3A                                |
| CCY2125                                     | BY4742 + <i>cen8::p<sup>-GAL1</sup>-CEN3:LYS2/cen8::p<sup>-GAL1</sup>-CEN3:lys2::pCC644:LEU2</i>                                                                                                                                                                                                                                                                                             | c      | S288c      | S3A                                |
| CCY2073                                     | BY4742 + <i>cen3::p<sup>-GAL1</sup>-CEN3:URA3/cen3::p<sup>-GAL1</sup>-CEN3:ura3::pCC644:HIS3</i> , <i>cen8::p<sup>-GAL1</sup>-CEN3:LYS2/cen8::p<sup>-GAL1</sup>-CEN3:lys2::pCC644:LEU2</i>                                                                                                                                                                                                   | c      | S288c      | 3E, 3F                             |
| CCY2074                                     | BY4742 + <i>cen2::p<sup>-GAL1</sup>-CEN3:URA3/cen2::p<sup>-GAL1</sup>-CEN3:ura3::pCC644:HIS3</i> , <i>cen8::p<sup>-GAL1</sup>-CEN3:LYS2/cen8::p<sup>-GAL1</sup>-CEN3:lys2::pCC644:LEU2</i>                                                                                                                                                                                                   | c      | S288c      | S2H                                |
| CCY2075                                     | BY4742 + <i>cen3::p<sup>-GAL1</sup>-CEN3:URA3/cen3::p<sup>-GAL1</sup>-CEN3:ura3::pCC644:HIS3</i> , <i>cen10::p<sup>-GAL1</sup>-CEN3:LYS2/cen10::p<sup>-GAL1</sup>-CEN3:lys2::pCC644:LEU2</i>                                                                                                                                                                                                 | c      | S288c      | 3E, 3F                             |

|         |                                                                                                                                                                                        |   |       |        |
|---------|----------------------------------------------------------------------------------------------------------------------------------------------------------------------------------------|---|-------|--------|
| CCY2076 | <i>BY4742 + cen10::p<sup>-</sup>GAL1-CEN3:URA3/cen10::p<sup>-</sup>GAL1-CEN3:ura3::pCC644:HIS3, cen8::p<sup>-</sup>GAL1-CEN3:LYS2/cen8::p<sup>-</sup>GAL1-CEN3:lys2::pCC644:LEU2</i>   | c | S288c | 3E, 3F |
| CCY2077 | <i>BY4742 + cen2::p<sup>-</sup>GAL1-CEN3:URA3/cen2::p<sup>-</sup>GAL1-CEN3:ura3::pCC644:HIS3, cen10::p<sup>-</sup>GAL1-CEN3:LYS2/cen10::p<sup>-</sup>GAL1-CEN3:lys2::pCC644:LEU2</i>   | c | S288c | S2h    |
| CCY2078 | <i>BY4742 + cen8::p<sup>-</sup>GAL1-CEN3:URA3/cen8::p<sup>-</sup>GAL1-CEN3:ura3::pCC644:HIS3, cen10::p<sup>-</sup>GAL1-CEN3:LYS2/cen10::p<sup>-</sup>GAL1-CEN3:lys2::pCC644:LEU2</i>   | c | S288c | 3E, 3F |
| CCY2260 | <i>BY4741 + cen1::p<sup>-</sup>GAL1-CEN3:URA3/cen1::p<sup>-</sup>GAL1-CEN3:ura3::pCC644:HIS3, cen8::p<sup>-</sup>GAL1-CEN3:LYS2/cen8::p<sup>-</sup>GAL1-CEN3:lys2::pCC644:LEU2</i>     | c | S288c | 3E, 3F |
| CCY2261 | <i>BY4741 + cen1::p<sup>-</sup>GAL1-CEN3:URA3/cen1::p<sup>-</sup>GAL1-CEN3:ura3::pCC644:HIS3, cen10::p<sup>-</sup>GAL1-CEN3:LYS2/cen10::p<sup>-</sup>GAL1-CEN3:lys2::pCC644:LEU2</i>   | c | S288c | 3E, 3F |
| CCY2264 | <i>BY4741 + cen3::p<sup>-</sup>GAL1-CEN3:URA3/cen3::p<sup>-</sup>GAL1-CEN3:ura3::pCC644:HIS3, cen8::p<sup>-</sup>GAL1-CEN3:LYS2/cen8::p<sup>-</sup>GAL1-CEN3:lys2::pCC644:LEU2</i>     | c | S288c | 3E, 3F |
| CCY2266 | <i>BY4742 + cen13::p<sup>-</sup>GAL1-CEN3:URA3/cen13::p<sup>-</sup>GAL1-CEN3:ura3::pCC644:HIS3, cen10::p<sup>-</sup>GAL1-CEN3:LYS2/cen10::p<sup>-</sup>GAL1-CEN3:lys2::pCC644:LEU2</i> | c | S288c | 3E, 3F |
| CCY2364 | <i>BY4742 + cen13::p<sup>-</sup>GAL1-CEN3:URA3/cen13::p<sup>-</sup>GAL1-CEN3:ura3::pCC644:HIS3, cen3::p<sup>-</sup>GAL1-CEN3:LYS2/cen3::p<sup>-</sup>GAL1-CEN3:lys2::pCC644:LEU2</i>   | c | S288c | 3E, 3F |
| CCY2366 | <i>BY4741 + cen2::p<sup>-</sup>GAL1-CEN3:URA3/cen2::p<sup>-</sup>GAL1-CEN3:ura3::pCC644:HIS3, cen3::p<sup>-</sup>GAL1-CEN3:LYS2/cen3::p<sup>-</sup>GAL1-CEN3:lys2::pCC644:LEU2</i>     | c | S288c | S2H    |
| CCY2368 | <i>BY4742 + cen8::p<sup>-</sup>GAL1-CEN3:URA3/cen8::p<sup>-</sup>GAL1-CEN3:ura3::pCC644:HIS3, cen3::p<sup>-</sup>GAL1-CEN3:LYS2/cen3::p<sup>-</sup>GAL1-CEN3:lys2::pCC644:LEU2</i>     | c | S288c | 3E, 3F |
| CCY2369 | <i>BY4741 + cen10::p<sup>-</sup>GAL1-CEN3:URA3/cen10::p<sup>-</sup>GAL1-CEN3:ura3::pCC644:HIS3, cen3::p<sup>-</sup>GAL1-CEN3:LYS2/cen3::p<sup>-</sup>GAL1-CEN3:lys2::pCC644:LEU2</i>   | c | S288c | 3E, 3F |
| CCY2370 | <i>BY4742 + cen13::p<sup>-</sup>GAL1-CEN3:URA3/cen13::p<sup>-</sup>GAL1-CEN3:ura3::pCC644:HIS3, cen3::p<sup>-</sup>GAL1-CEN3:LYS2/cen3::p<sup>-</sup>GAL1-CEN3:lys2::pCC644:LEU2</i>   | c | S288c | 3E, 3F |
| CCY2372 | <i>BY4741 + cen2::p<sup>-</sup>GAL1-CEN3:URA3/cen2::p<sup>-</sup>GAL1-CEN3:ura3::pCC644:HIS3, cen1::p<sup>-</sup>GAL1-CEN3:LYS2/cen1::p<sup>-</sup>GAL1-CEN3:lys2::pCC644:LEU2</i>     | c | S288c | S2H    |
| CCY2374 | <i>BY4741 + cen3::p<sup>-</sup>GAL1-CEN3:URA3/cen3::p<sup>-</sup>GAL1-CEN3:ura3::pCC644:HIS3, cen1::p<sup>-</sup>GAL1-</i>                                                             | c | S288c | 3E, 3F |

|                              |                                                                                                                                                                                                                                             |   |       |                   |
|------------------------------|---------------------------------------------------------------------------------------------------------------------------------------------------------------------------------------------------------------------------------------------|---|-------|-------------------|
|                              | <i>CEN3:LYS2/cen1::p<sup>-GAL1</sup><br/>CEN3:lys2::pCC644:LEU2</i>                                                                                                                                                                         |   |       |                   |
| CCY2376                      | <i>BY4741 + cen8::p<sup>-GAL1</sup>-CEN3:URA3/cen8::p<sup>-GAL1</sup><br/>CEN3:ura3::pCC644:HIS3, cen1::p<sup>-GAL1</sup><br/>CEN3:LYS2/cen1::p<sup>-GAL1</sup><br/>CEN3:lys2::pCC644:LEU2</i>                                              | c | S288c | 3E, 3F            |
| CCY2378                      | <i>BY4742 + cen10::p<sup>-GAL1</sup>-CEN3:URA3/cen10::p<sup>-GAL1</sup><br/>CEN3:ura3::pCC644:HIS3, cen1::p<sup>-GAL1</sup><br/>CEN3:LYS2/cen1::p<sup>-GAL1</sup><br/>CEN3:lys2::pCC644:LEU2</i>                                            | c | S288c | 3E, 3F            |
| CCY2379                      | <i>BY4742 + cen13::p<sup>-GAL1</sup>-CEN3:URA3/cen13::p<sup>-GAL1</sup><br/>CEN3:ura3::pCC644:HIS3, cen1::p<sup>-GAL1</sup><br/>CEN3:LYS2/cen1::p<sup>-GAL1</sup><br/>CEN3:lys2::pCC644:LEU2</i>                                            | c | S288c | 3E, 3F            |
| CCY1480                      | <i>MATa/MATa, ura3-1/ura3-1, LEU2/leu2,3-112,<br/>LYS2/lys2Δ, ADE2/ade2-1, can1-100, bar1Δ, his3-<br/>11:pCUP1-GFP12-lacI12:HIS3/his3-11:pCUP1-<br/>GFP12-lacI12:HIS3 trp1-1:256lacO:TRP1/ trp1-<br/>1:256lacO:TRP1, NBL1/nbl1Δ::hphNT1</i> | c | W303  | -                 |
| <i>nbl1Δ-ad<br/>haploids</i> | <i>All nbl1Δ-ad strains were derived from tetrad<br/>dissection of CCY1480</i>                                                                                                                                                              | c | W303  | 4B, 4C,<br>4D, 4E |
| CCY1482                      | <i>MATa/MATa, ura3-1/ura3-1, LEU2/leu2,3-112,<br/>LYS2/lys2Δ, ADE2/ade2-1, can1-100, bar1Δ, his3-<br/>11:pCUP1-GFP12-lacI12:HIS3/his3-11:pCUP1-<br/>GFP12-lacI12:HIS3 trp1-1:256lacO:TRP1/ trp1-<br/>1:256lacO:TRP1, SGO1/sgo1Δ::hphNT1</i> | c | W303  | -                 |
| <i>sgo1Δ-ad<br/>haploids</i> | <i>All sgo1Δ-ad strains were derived from tetrad<br/>dissection of CCY1482</i>                                                                                                                                                              | c | W303  | 4B, 4C,<br>4D, 4E |
| CCY1484                      | <i>MATa/MATa, ura3-1/ura3-1, LEU2/leu2,3-112,<br/>LYS2/lys2Δ, ADE2/ade2-1, can1-100, bar1Δ, his3-<br/>11:pCUP1-GFP12-lacI12:HIS3/his3-11:pCUP1-<br/>GFP12-lacI12:HIS3 trp1-1:256lacO:TRP1/ trp1-<br/>1:256lacO:TRP1, BUB1/bub1Δ::hphNT1</i> | c | W303  | -                 |
| <i>bub1Δ-ad<br/>haploids</i> | <i>All bub1Δ-ad strains were derived from tetrad<br/>dissection of CCY1484</i>                                                                                                                                                              | c | W303  | 4B, 4C,<br>4D, 4E |
| CCY1739                      | <i>tetradploid,<br/>MATa/MATaΔ::natNT2/Mata/MataΔ::kanMX4,<br/>ura3-1, lys2Δ, LEU2/leu2,3-112, his3-11:pCUP1-<br/>GFP12-lacI12:HIS3 trp1-1:256lacO:TRP1<br/>ADE2/ade2-1, can1-100, bar1Δ,<br/>BIR1/BIR1/bir1Δ::hphNT1/bir1Δ::hphNT1</i>     | c | W303  | -                 |
| CCY1743                      | <i>MATa/MATa, ura3-1/ura3-1, lys2Δ/lys2Δ,<br/>LEU2/leu2,3-112, his3-11:pCUP1-GFP12-<br/>lacI12:HIS3, trp1-1:256lacO:TRP1, ADE2/ade2-1,<br/>can1-100, bar1Δ, bir1Δ::hphNT1/bir1Δ::natNT2,<br/>pCC599::URA3</i>                               | c | W303  | -                 |
| CCY1744                      | <i>MATa/MATa, ura3-1/ura3-1, lys2Δ/lys2Δ,<br/>LEU2/leu2,3-112, his3-11:pCUP1-GFP12-<br/>lacI12:HIS3, trp1-1:256lacO:TRP1, ADE2/ade2-1,<br/>can1-100, bar1Δ, bir1Δ::hphNT1/bir1Δ::kanMX4,<br/>pCC599::URA3</i>                               | c | W303  | -                 |
| <i>bir1Δ-ad<br/>diploids</i> | <i>All 25 strains were derived from tetrad dissection<br/>of strains with the genotype of CCY1739, or from<br/>counter-selection of URA3 plasmid of CCY1743,</i>                                                                            | c | W303  | 5, S3B            |

|                                          |                                                                                          |   |      |               |
|------------------------------------------|------------------------------------------------------------------------------------------|---|------|---------------|
|                                          | CCY1744                                                                                  |   |      |               |
| <i>bir1Δ-ad2</i> diploids                | All <i>bir1Δ-ad2</i> diploid strains were derived from <i>bir1Δ-ad</i> diploids          | c | W303 | 7D, 7E        |
| CCY1295                                  | CCY149 + <i>SLI15/sli15 Δ:natNT2</i>                                                     | c | W303 | -             |
| CCY1320                                  | CCY1295 + <i>ura3-1:pCC411:URA3</i>                                                      | c | W303 | -             |
| <i>bir1Δ-ad</i> <i>SLI15</i> Duplication | All <i>bir1Δ-ad</i> <i>SLI15</i> Duplication strains were derived from spores of CCY1320 | c | W303 | S2C, S2D, S2E |
| CCY2761                                  | CCY1295 + <i>cup1-1:pCC607:URA3</i>                                                      | c | W303 | -             |
| <i>bir1Δ-ad</i> <i>SLI15</i> Relocation  | All <i>bir1Δ-ad</i> <i>SLI15</i> Relocation strains were derived from spores of CCY2761  | c | W303 | S2G           |
| CCY2115                                  | CCY1905 + <i>trp1-1:pCC272:TRP1</i>                                                      | c | W303 | S2B           |

| Plasmid        | Description                                                                                                                                                     | Source |  |  |
|----------------|-----------------------------------------------------------------------------------------------------------------------------------------------------------------|--------|--|--|
| pRS306         | <i>pBluescript URA3</i>                                                                                                                                         | d      |  |  |
| pCC272         | <i>SLI15 + 1kb upstream in pRS304</i>                                                                                                                           | c      |  |  |
| pCC283         | <i>BIR1 + 1kb upstream in pRS306</i>                                                                                                                            | a      |  |  |
| pKA52          | <i>HIS3</i> integration plasmid with part of <i>URA3</i> inserted at the MCS. Can insert <i>HIS3</i> into a <i>URA3</i> locus. Used for making disomic strains. | e      |  |  |
| pGALCEN-JC3-13 | For replacing centromeres with <i>CEN3</i> under the <i>GAL-10</i> promoter ( <i>URA3</i> )                                                                     | e      |  |  |
| pCC658         | For replacing centromeres with <i>CEN3</i> under the <i>GAL-10</i> promoter ( <i>LYS2</i> )                                                                     | c      |  |  |
| pCC644         | <i>LEU2</i> integration vector with bases 3043-3538 of <i>LYS2</i> for Disruption of the <i>LYS2</i> gene. Used for making disomic strains.                     | c      |  |  |
| pCC598         | <i>BIR1 + 1kb upstream in pRS306</i>                                                                                                                            | c      |  |  |
| pCC411         | <i>SLI15 + 1kb upstream in pRS306</i>                                                                                                                           | c      |  |  |
| pCC607         | <i>pCC411 + sequence from Cup1-1 gene for integrating Sli15 plus promoter into that location of chromosome 8</i>                                                | c      |  |  |

### Key

### Source

- a Campbell and Desai, Nature 497: 118–121 (2013)
- b Brachmann CB et al., Yeast. (1998)
- c This study
- d Sinorski and Hieter Genetics 122: 19-27 (1989)
- e Anders et. al., BMC Genetics (2009)
