# Supplementary material for: Genetic interactions between specific chromosome copy number alterations dictate complex aneuploidy patterns
Source: PubMed Central journal article supplement (PMC6295164; doi:10.1101/gad.319400.118), 2018-12-01
Supplement: supp_gad.319400.118_Supplemental_Table_S2.pdf [file supp_gad.319400.118_Supplemental_Table_S2.pdf]

**Table S2. Filtering of cancer karyotypes based on type of aneuploidy. Related to Figure 6.**

| <b>Cancer type</b>                    | <b>Number of samples</b> | <b>Samples with only whole chromosome/arm aneuploidy</b> | <b>Number with complex whole chromosome/arm aneuploidy</b> | <b>Percent with complex whole chromosome/arm aneuploidy</b> |
|---------------------------------------|--------------------------|----------------------------------------------------------|------------------------------------------------------------|-------------------------------------------------------------|
| Breast Invasive Carcinoma             | 1096                     | 214                                                      | 177                                                        | 16                                                          |
| Glioblastoma Multiforme               | 593                      | 170                                                      | 161                                                        | 27                                                          |
| Ovarian Serous Cystadenocarcinoma     | 573                      | 13                                                       | 11                                                         | 2                                                           |
| Lung Adenocarcinoma                   | 518                      | 114                                                      | 97                                                         | 19                                                          |
| Uterine Corpus Endometrial Carcinoma  | 547                      | 323                                                      | 137                                                        | 25                                                          |
| Kidney Renal Clear Cell Carcinoma     | 532                      | 273                                                      | 253                                                        | 48                                                          |
| Head and Neck Squamous Cell Carcinoma | 531                      | 120                                                      | 98                                                         | 18                                                          |
| Brain Lower Grade Glioma              | 514                      | 225                                                      | 193                                                        | 38                                                          |
| Thyroid Carcinoma                     | 505                      | 468                                                      | 42                                                         | 8                                                           |
| Lung Squamous Cell Carcinoma          | 504                      | 59                                                       | 49                                                         | 10                                                          |
| Prostate Adenocarcinoma               | 498                      | 198                                                      | 75                                                         | 15                                                          |
| Skin Cutaneous Melanoma               | 470                      | 91                                                       | 78                                                         | 17                                                          |
| Colon Adenocarcinoma                  | 458                      | 198                                                      | 138                                                        | 30                                                          |
| Stomach Adenocarcinoma                | 443                      | 159                                                      | 119                                                        | 27                                                          |
| Bladder Urothelial Carcinoma          | 412                      | 65                                                       | 47                                                         | 11                                                          |
