# Supplementary material for: Genetic interactions between specific chromosome copy number alterations dictate complex aneuploidy patterns
Source: PubMed Central journal article supplement (PMC6295164; doi:10.1101/gad.319400.118), 2018-12-01
Supplement: supp_gad.319400.118_Supplemental_Table_S3.pdf [file supp_gad.319400.118_Supplemental_Table_S3.pdf]

**Table S3. List of genes mutated in the *bir1Δ-ad* strains.**

| <b>Systematic</b> | <b>Standard</b> | <b>Mutant</b> | <b>Residue</b> | <b>CIN gene</b> |
|-------------------|-----------------|---------------|----------------|-----------------|
| tS(UGA)I          | SUP17           | missense      | A18G           | no              |
| tV(AAC)G2         | None            | nonsense      | E15*           | no              |
| YAL051W           | OAF1            | missense      | V939I          | no              |
| YAR028W           | None            | missense      | D32N           | no              |
| YCR017C           | CWH43           | missense      | E250G          | no              |
| YCR021C           | HSP30           | missense      | R11C           | no              |
| YCR033W           | SNT1            | missense      | F870I          | yes             |
| YDL101C           | DUN1            | missense      | A307V          | yes             |
| YDL137W           | ARF2            | missense      | S147C          | no              |
| YDL145C           | COP1            | missense      | I307S          | no              |
| YDL156W           | CMR1            | missense      | L27F           | yes             |
| YDL171C           | GLT1            | missense      | D1583V         | no              |
| YDL190C           | UFD2            | missense      | Q88E           | no              |
| YDL243C           | AAD4            | indel         | 70             | no              |
| YDR104C           | SPO71           | missense      | D814N          | no              |
| YDR142C           | PEX7            | missense      | L253I          | no              |
| YDR159W           | SAC3            | missense      | I1097L         | no              |
| YDR180W           | SCC2            | missense      | N63Y           | yes             |
| YDR189W           | SLY1            | missense      | D151N          | yes             |
| YDR190C           | RVB1            | missense      | T322K          | no              |
| YDR238C           | SEC26           | missense      | F555L          | no              |
| YDR302W           | GPI11           | missense      | R29L           | no              |
| YDR304C           | CPR5            | missense      | V188L          | no              |
| YDR321W           | ASP1            | missense      | R55I           | no              |
| YDR325W           | YCG1            | missense      | G677R          | yes             |
| YDR333C           | RQC1            | indel         | 565            | no              |
| YDR335W           | MSN5            | missense      | H426Y          | no              |
| YDR387C           | CIN10           | missense      | S311T          | yes             |
| YDR389W           | SAC7            | missense      | L511F          | no              |
| YDR422C           | SIP1            | missense      | E357D          | no              |
| YDR440W           | DOT1            | missense      | H142N          | no              |
| YDR451C           | YHP1            | missense      | A273T          | no              |
| YDR492W           | IZH1            | missense      | E35K           | no              |
| YDR523C           | SPS1            | missense      | F248S          | no              |
| YDR527W           | RBA50           | missense      | G22V           | no              |
| YEL060C           | PRB1            | missense      | G304R          | no              |
| YER002W           | NOP16           | missense      | D122V          | no              |
| YER008C           | SEC3            | missense      | Q495R          | no              |
| YER027C           | GAL83           | missense      | P78S           | no              |
| YER043C           | SAH1            | missense      | R241C          | no              |
| YER053C           | PIC2            | missense      | N49Y           | no              |
| YER066W           | RRT13           | missense      | G93S           | no              |
| YER095W           | RAD51           | missense      | G40V           | yes             |
| YER109C           | FLO8            | missense      | A529T          | no              |
| YER116C           | SLX8            | missense      | P150S          | yes             |
| YER154W           | OXA1            | missense      | D239H          | no              |
| YER155C           | BEM2            | missense      | H2114Q         | no              |

|           |         |          |        |     |
|-----------|---------|----------|--------|-----|
| YER167W   | BCK2    | missense | S414P  | no  |
| YER172C   | BRR2    | missense | K351N  | no  |
| YER172C   | BRR2    | missense | N352Y  | no  |
| YER173W   | RAD24   | missense | T622A  | yes |
| YER176W   | ECM32   | indel    | 781    | no  |
| YFL002C   | SPB4    | missense | R207S  | no  |
| YFL013C   | IES1    | missense | D309V  | no  |
| YFL013C   | IES1    | nonsense | Y572*  | no  |
| YFL021W   | GAT1    | missense | H182Y  | no  |
| YFL024C   | EPL1    | indel    | Q790   | no  |
| YFL024C   | EPL1    | indel    | Q790   | no  |
| YFR015C   | GSY1    | missense | A639T  | no  |
| YFR029W   | PTR3    | missense | D19E   | no  |
| YFR040W   | SAP155  | missense | D780H  | no  |
| YGL017W   | ATE1    | missense | A274S  | no  |
| YGL203C   | KEX1    | missense | P43S   | no  |
| YGL206C   | CHC1    | missense | P1463Q | no  |
| YGL207W   | SPT16   | missense | W54R   | yes |
| YGL207W   | SPT16   | missense | T713A  | yes |
| YGR054W   | None    | missense | P242Q  | no  |
| YGR070W   | ROM1    | missense | V248A  | no  |
| YGR080W   | TWF1    | missense | E51D   | no  |
| YGR090W   | UTP22   | missense | S819L  | no  |
| YGR130C   | None    | indel    | 190    | no  |
| YGR142W   | BTN2    | indel    | 310    | no  |
| YGR208W   | SER2    | missense | A271T  | no  |
| YGR241C   | YAP1802 | indel    | 514    | no  |
| YGR253C   | PUP2    | missense | D71N   | yes |
| YGR257C   | MTM1    | indel    | 344    | no  |
| YGR271C-A | EFG1    | missense | L118F  | no  |
| YGR271W   | SLH1    | missense | N924K  | no  |
| YHL008C   | None    | indel    | 449    | no  |
| YHL034C   | SBP1    | missense | V44I   | no  |
| YHL041W   | None    | missense | S101F  | no  |
| YHR030C   | SLT2    | missense | L159F  | no  |
| YHR042W   | NCP1    | missense | L315M  | no  |
| YHR046C   | INM1    | missense | G112V  | no  |
| YHR072W   | ERG7    | missense | S612F  | no  |
| YHR078W   | None    | missense | C408Y  | no  |
| YHR106W   | TRR2    | missense | C165F  | no  |
| YHR117W   | TOM71   | missense | T293A  | no  |
| YHR138C   | None    | missense | V27A   | no  |
| YIL010W   | DOT5    | missense | S14F   | yes |
| YIL042C   | PKP1    | missense | R97K   | no  |
| YIL073C   | SPO22   | nonsense | Q38*   | no  |
| YIL078W   | THS1    | missense | P174S  | no  |
| YIL090W   | ICE2    | missense | C364R  | yes |
| YIL166C   | SOA1    | indel    | 394    | no  |
| YIL169C   | CSS1    | indel    | 942    | no  |

|         |        |          |        |     |
|---------|--------|----------|--------|-----|
| YIR016W | None   | missense | D252H  | no  |
| YJL005W | CYR1   | missense | H1984L | no  |
| YJL080C | SCP160 | missense | R152G  | no  |
| YJL158C | CIS3   | missense | S191N  | no  |
| YJR062C | NTA1   | missense | S424G  | no  |
| YJR109C | CPA2   | missense | A1049P | no  |
| YKL021C | MAK11  | missense | C252R  | no  |
| YKL040C | NFU1   | missense | M213I  | no  |
| YKL078W | DHR2   | missense | G161A  | no  |
| YKL080W | VMA5   | missense | L130S  | no  |
| YKL182W | FAS1   | missense | A632T  | no  |
| YKL183W | LOT5   | missense | D54V   | no  |
| YKL191W | DPH2   | missense | N386K  | no  |
| YKL215C | OXF1   | missense | T310A  | no  |
| YKR021W | ALY1   | missense | L621M  | no  |
| YKR039W | GAP1   | missense | A527T  | no  |
| YKR054C | DYN1   | missense | N2915I | no  |
| YKR095W | MLP1   | missense | Q1040P | no  |
| YLL061W | MMP1   | missense | H550N  | no  |
| YLR020C | YEH2   | missense | Q479L  | no  |
| YLR024C | UBR2   | missense | S1400C | no  |
| YLR024C | UBR2   | nonsense | S1483* | no  |
| YLR045C | STU2   | missense | P146S  | no  |
| YLR067C | PET309 | missense | G350D  | no  |
| YLR096W | KIN2   | indel    | 730    | no  |
| YLR145W | RMP1   | missense | C132Y  | no  |
| YLR196W | PWP1   | missense | E129D  | yes |
| YLR332W | MID2   | missense | I359L  | no  |
| YLR369W | SSQ1   | missense | K303R  | no  |
| YLR383W | SMC6   | missense | M270V  | yes |
| YLR410W | VIP1   | missense | K262T  | yes |
| YLR417W | VPS36  | missense | A412G  | no  |
| YLR422W | DCK1   | missense | S370L  | no  |
| YLR454W | FMP27  | missense | M1621I | no  |
| YML072C | TCB3   | missense | D168E  | no  |
| YML097C | VPS9   | missense | C260Y  | no  |
| YML100W | TSL1   | missense | M121I  | no  |
| YMR026C | PEX12  | missense | T241M  | no  |
| YMR092C | AIP1   | missense | Y515H  | no  |
| YMR129W | POM152 | missense | G1069S | no  |
| YMR154C | RIM13  | missense | A93G   | no  |
| YMR178W | None   | missense | S234T  | no  |
| YMR207C | HFA1   | missense | G110D  | yes |
| YMR246W | FAA4   | missense | F356C  | yes |
| YMR317W | None   | indel    | 270    | yes |
| YMR317W | None   | indel    | 270    | yes |
| YNL054W | VAC7   | missense | P143S  | no  |
| YNL077W | APJ1   | missense | P107Q  | no  |
| YNL078W | NIS1   | indel    | 4      | no  |

|         |        |          |        |     |
|---------|--------|----------|--------|-----|
| YNL082W | PMS1   | missense | T92M   | no  |
| YNL178W | RPS3   | missense | A80T   | no  |
| YNL258C | DSL1   | missense | K615N  | no  |
| YNL261W | ORC5   | missense | D323G  | yes |
| YNL287W | SEC21  | missense | S405Y  | no  |
| YNR016C | ACC1   | missense | A1019V | yes |
| YNR030W | ALG12  | missense | N477K  | no  |
| YNR059W | MNT4   | nonsense | W285*  | no  |
| YOL039W | RPP2A  | missense | G74A   | no  |
| YOL075C | None   | missense | C506F  | no  |
| YOL081W | IRA2   | missense | A1845S | yes |
| YOL110W | SHR5   | missense | R113P  | no  |
| YOR076C | SKI7   | missense | D430V  | no  |
| YOR101W | RAS1   | missense | R109T  | no  |
| YOR107W | RGS2   | missense | H71Q   | no  |
| YOR151C | RPB2   | missense | G888C  | yes |
| YOR168W | GLN4   | missense | F61Y   | yes |
| YOR195W | SLK19  | missense | N291S  | yes |
| YOR204W | DED1   | missense | H93Q   | no  |
| YOR241W | MET7   | missense | E306D  | no  |
| YOR275C | RIM20  | nonsense | E269*  | no  |
| YOR291W | YPK9   | missense | E1231V | no  |
| YOR301W | RAX1   | missense | Q179H  | no  |
| YOR335C | ALA1   | missense | K611M  | no  |
| YOR354C | MSC6   | missense | T562R  | no  |
| YPL045W | VPS16  | missense | V617I  | no  |
| YPL056C | LCL1   | missense | V55L   | no  |
| YPL086C | ELP3   | missense | L512F  | no  |
| YPL100W | ATG21  | missense | K32N   | no  |
| YPL106C | SSE1   | missense | L278F  | yes |
| YPL116W | HOS3   | missense | Q578P  | no  |
| YPL184C | MRN1   | missense | E91Q   | no  |
| YPL249C | GYP5   | missense | M472I  | no  |
| YPL264C | None   | missense | M273I  | no  |
| YPL272C | PBI1   | missense | G25R   | no  |
| YPR014C | None   | missense | V39G   | no  |
| YPR029C | APL4   | missense | H64N   | no  |
| YPR043W | RPL43A | missense | C12S   | no  |
| YPR095C | SYT1   | missense | Y1058N | no  |
| YPR097W | None   | missense | V368L  | no  |
| YPR116W | RRG8   | nonsense | S86*   | no  |
| YPR120C | CLB5   | missense | D43N   | yes |
| YPR138C | MEP3   | missense | A26P   | no  |
| YPR173C | VPS4   | missense | E126Q  | no  |
| YPR192W | AQY1   | missense | F62S   | no  |
