# Supplementary material for: Genetic interactions between specific chromosome copy number alterations dictate complex aneuploidy patterns
Source: PubMed Central journal article supplement (PMC6295164; doi:10.1101/gad.319400.118), 2018-12-01
Supplement: supp_gad.319400.118_Supplemental_Table_S4.pdf [file supp_gad.319400.118_Supplemental_Table_S4.pdf]

**Table S4. List of heterozygous mutations in the *bir1Δ-ad* strains.**

| <b>Chromosome</b> | <b>Systematic name</b> | <b>Standard name</b> | <b>Mutant type</b> | <b>Residue change</b> |
|-------------------|------------------------|----------------------|--------------------|-----------------------|
| 1                 | YAL048C                | GEM1                 | missense           | H356N                 |
| 1                 | YAL034C                | FUN19                | missense           | A286S                 |
| 2                 | tL(UAA)B1              | None                 | missense           | V15F                  |
| 2                 | YBL098W                | BNA4                 | missense           | G313C                 |
| 2                 | YBL079W                | NUP170               | missense           | F669Y                 |
| 2                 | YBL066C                | SEF1                 | missense           | H42Y                  |
| 2                 | YBL063W                | KIP1                 | missense           | P1070L                |
| 2                 | YBL061C                | SKT5                 | missense           | A378T                 |
| 2                 | YBL050W                | SEC17                | missense           | R73M                  |
| 2                 | YBL047C                | EDE1                 | missense           | R387K                 |
| 2                 | YBL022C                | PIM1                 | missense           | A851V                 |
| 2                 | YBL019W                | APN2                 | missense           | F31L                  |
| 2                 | YBR045C                | GIP1                 | missense           | S233R                 |
| 2                 | YBR066C                | NRG2                 | missense           | K68Q                  |
| 2                 | YBR092C                | PHO3                 | missense           | S132P                 |
| 2                 | YBR133C                | HSL7                 | missense           | S29C                  |
| 2                 | YBR136W                | MEC1                 | missense           | S1709*                |
| 2                 | YBR162C                | TOS1                 | missense           | G449A                 |
| 2                 | YBR180W                | DTR1                 | missense           | A202V                 |
| 2                 | YBR222C                | PCS60                | missense           | S217N                 |
| 2                 | YBR236C                | ABD1                 | missense           | T313I                 |
| 2                 | YBR272C                | HSM3                 | missense           | Y73*                  |
| 2                 | YBR285W                | None                 | missense           | F123L                 |
| 2                 | YBR289W                | SNF5                 | missense           | D315Y                 |
| 3                 | YCR032W                | BPH1                 | missense           | H1648Q                |
| 3                 | YCR061W                | None                 | missense           | G442A                 |
| 3                 | YCR093W                | CDC39                | missense           | V511M                 |
| 8                 | YHL030W                | ECM29                | missense           | F1508C                |
| 8                 | YHR070W                | TRM5                 | missense           | V30M                  |
| 8                 | YHR193C                | EGD2                 | missense           | K100N                 |
| 10                | YJL208C                | NUC1                 | missense           | L265F                 |
| 10                | YJL165C                | HAL5                 | missense           | E20K                  |
| 10                | YJL090C                | DPB11                | missense           | G284D                 |
| 10                | YJL051W                | IRC8                 | missense           | N728I                 |
| 10                | YJL039C                | NUP192               | missense           | K567E                 |
| 10                | YJL034W                | KAR2                 | missense           | P162T                 |
| 10                | YJR045C                | SSC1                 | missense           | K579N                 |
| 10                | YJR052W                | RAD7                 | missense           | L444Q                 |
| 10                | YJR094C                | IME1                 | missense           | H243N                 |
| 10                | YJR113C                | RSM7                 | missense           | E36D                  |
| 10                | YJR117W                | STE24                | missense           | D52N                  |
